## Articles of interest in other COB journals

From *Journal of Cell Science*

**Expression of ceramide glucosyltransferases, which are essential for glycosphingolipid synthesis, is only required in a small subset of *C. elegans* cells**

Esther Marza, Karina T. Simonsen, Nils J. Færgeman and Giovanni M. Lesa

Marza, E. et al. 2009. *J. Cell Sci.* doi: 10.1242/jcs.042754

**H-Ras is degraded by Wnt/ $\beta$ -catenin signaling via  $\beta$ -TrCP-mediated polyubiquitylation**

Sung-Eun Kim, Ju-Yong Yoon, Woo-Jeong Jeong, Sung-Hoo Jeon, Yoon Park, Jong-Bok Yoon, Young Nyun Park, Hoguen Kim and Kang-Yell Choi

Kim, S.-E. et al. 2009. *J. Cell Sci.* doi: 10.1242/jcs.040493
